# Supplementary material for: Promoted adsorptive removal of chromium(vi) ions from water by a green-synthesized hybrid magnetic nanocomposite (NFe3O4Starch-Glu-NFe3O4ED)
Source: Royal Society of Chemistry journal article supplement (doi:10.1039/d1ra00961c), 2021-01-01
Supplement: d1ra00961c1.pdf [file d1ra00961c1.pdf]

### Electronic Supplementary Information

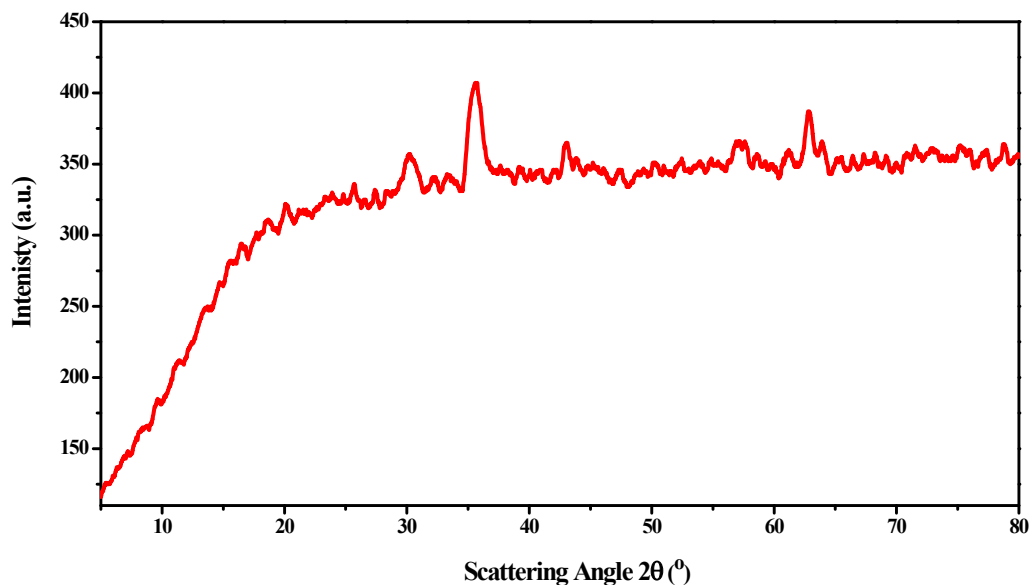

**Fig. S1.** XRD patterns of the NFe<sub>3</sub>O<sub>4</sub>Starch-Glu-NFe<sub>3</sub>O<sub>4</sub>ED nanocomposite.

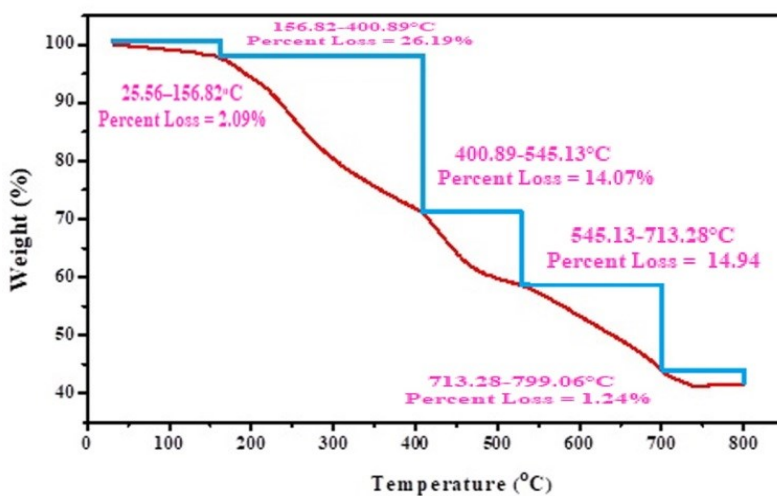

**Fig. S2.** TGA thermogram of the NFe<sub>3</sub>O<sub>4</sub>Starch-Glu-NFe<sub>3</sub>O<sub>4</sub>ED nanocomposite.

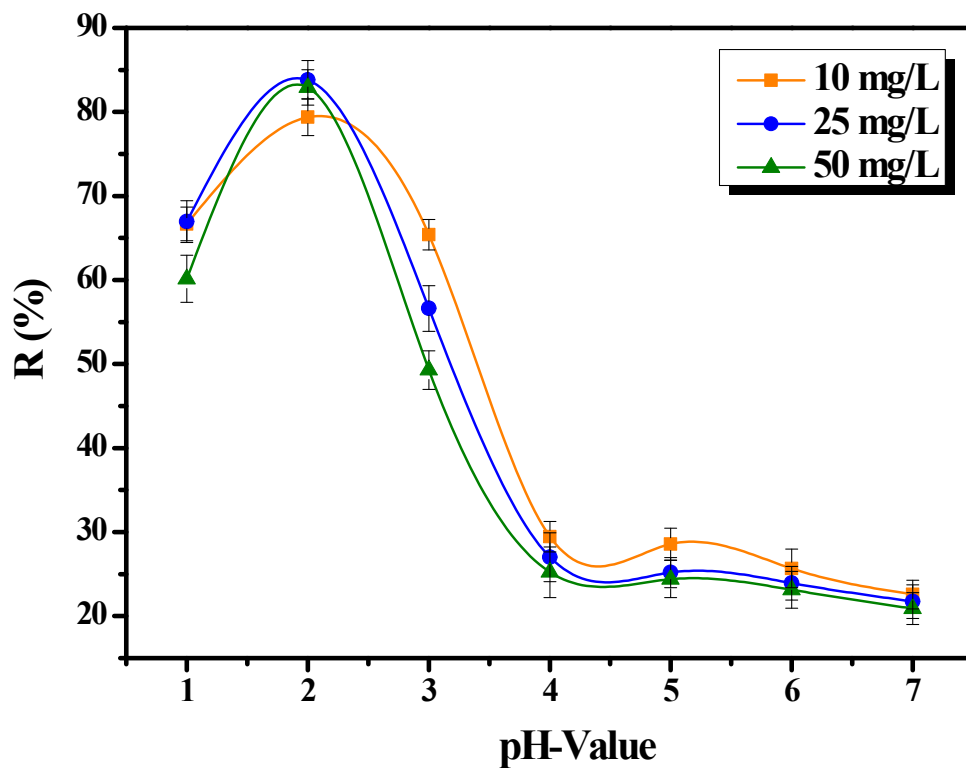

**Fig. S3.** Effect of initial solution pH on Cr(VI) ions removal percentage (%R) by the NFe<sub>3</sub>O<sub>4</sub>Starch-Glu-NFe<sub>3</sub>O<sub>4</sub>ED nanocomposite. (Sample volume = 10.0 mL; nanosorbent dose = 10.0±1.0 mg; Cr(VI) initial concentrations = 10.0, 25.0, and 50.0 mg/L; pH value = 1.0, 2.0, 3.0, 4.0, 5.0, 6.0, and 7.0; shaking time = 60.0 min; temperature = 25.0°C; shaking speed = 250.0 rpm).

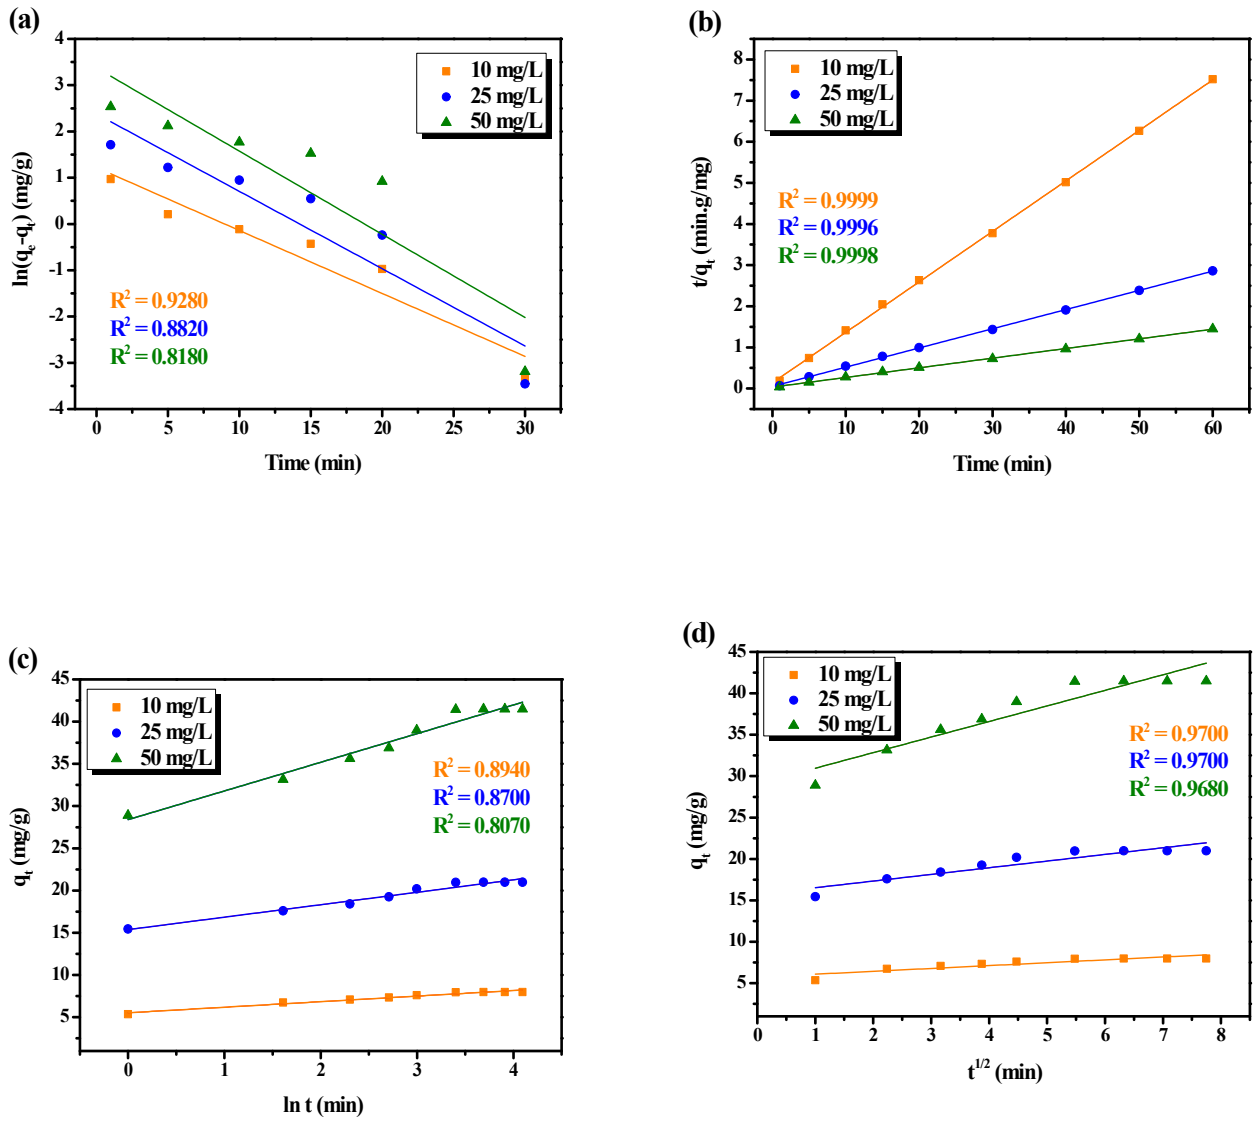

**Fig. S4.** (a) *Pseudo-first order*, (b) *Pseudo-second order*, (c) *Intra-particle diffusion*, and (d) *Elovich kinetic models*, for Cr(VI) ions (concentration = 10.0, 25.0, and 50.0mg/L) adsorption onto the  $\text{NFe}_3\text{O}_4\text{Starch-Glu-NFe}_3\text{O}_4\text{ED}$  nanocomposite at 25.0°C.

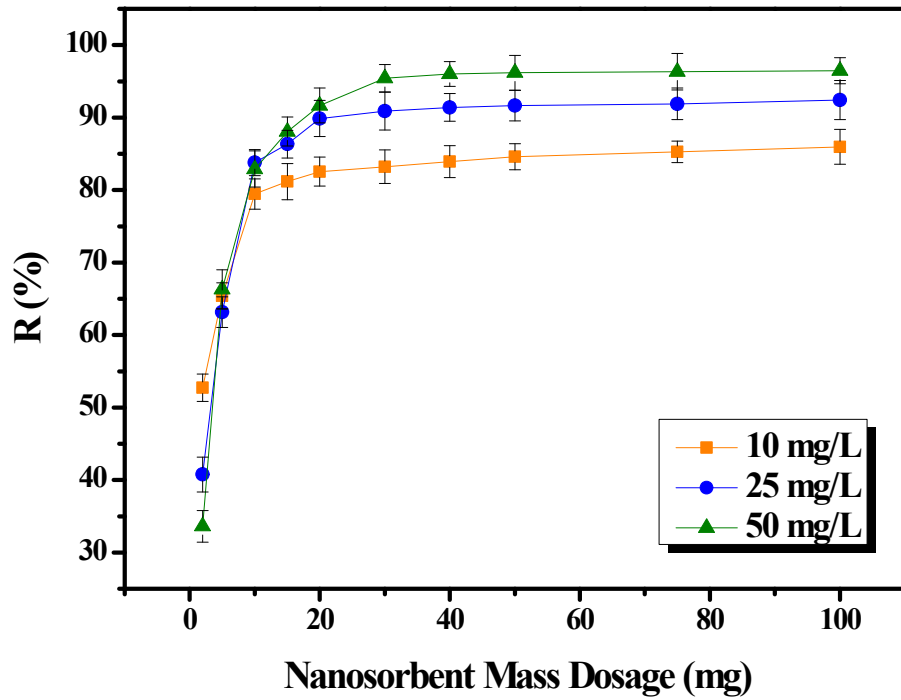

**Fig. S5.** Effect of dosage on Cr(VI) ions removal percentage (%R) by the  $\text{NFe}_3\text{O}_4\text{Starch-Glu-NFe}_3\text{O}_4\text{ED}$  nanocomposite. (Sample volume = 10.0 mL; nanosorbent dose = 2.0, 5.0, 10.0, 15.0, 20.0, 30.0, 40.0, 50.0, 75.0, and 100.0 $\pm$ 1 mg; Cr(VI) initial concentrations = 10.0, 25.0, and 50.0 mg/L; pH value = 2.0; shaking time = 60.0 min; temperature = 25.0 $^\circ$ C; shaking speed = 250.0 rpm).

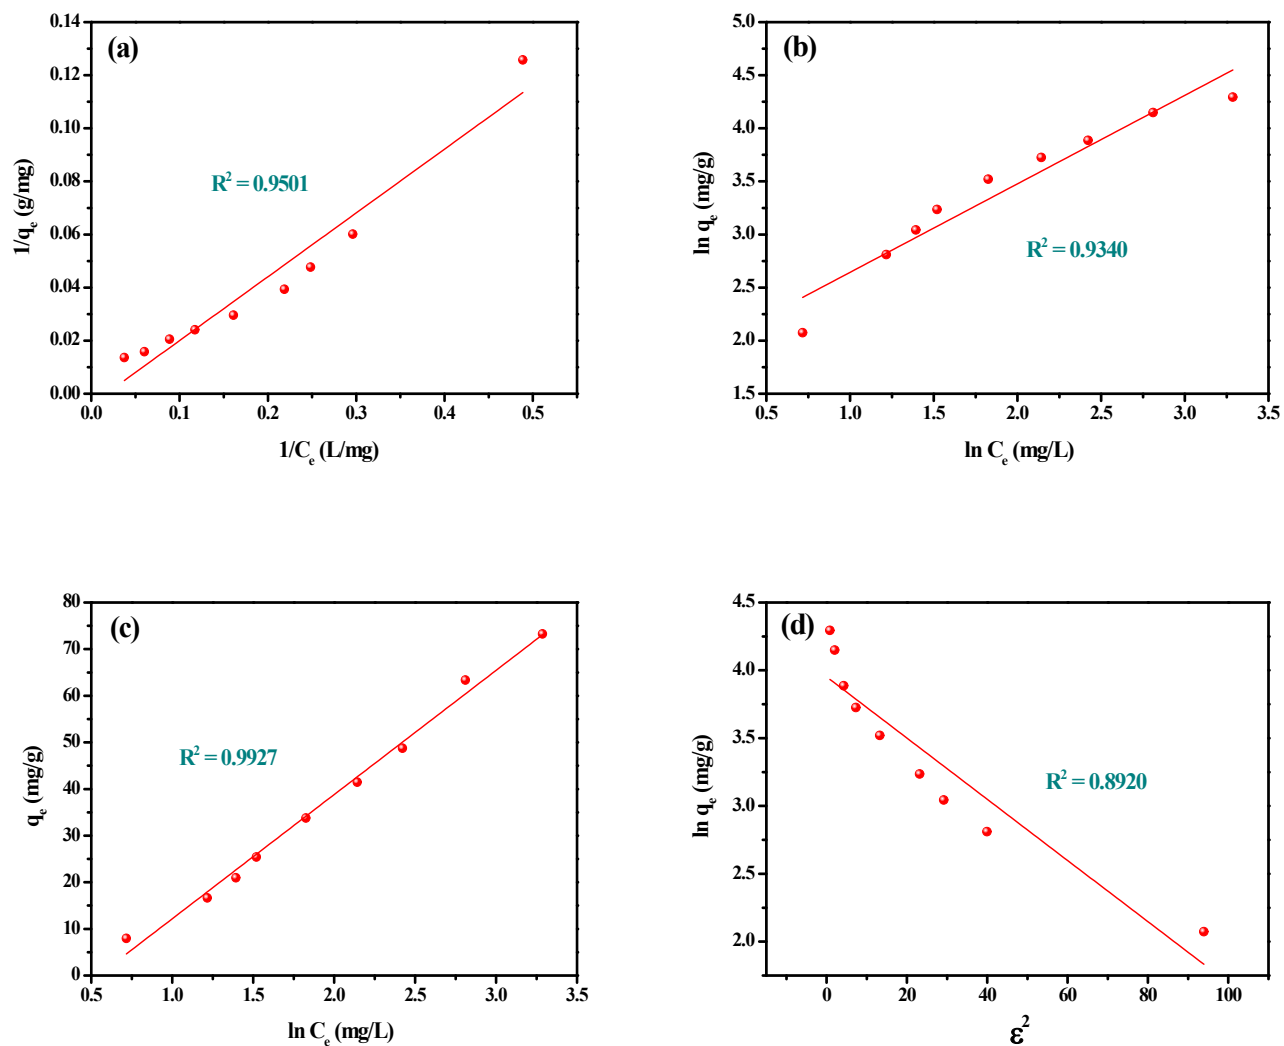

**Fig. S6.** (a) Langmuir, (b) Freundlich, (c) Temkin, and (d) D-R isotherm models for Cr(VI) ions (concentration = 10.0, 25.0, and 50.0mg/L) adsorption onto the  $\text{NFe}_3\text{O}_4\text{Starch-Glu-NFe}_3\text{O}_4\text{ED}$  nanocomposite at  $25.0^\circ\text{C}$ .

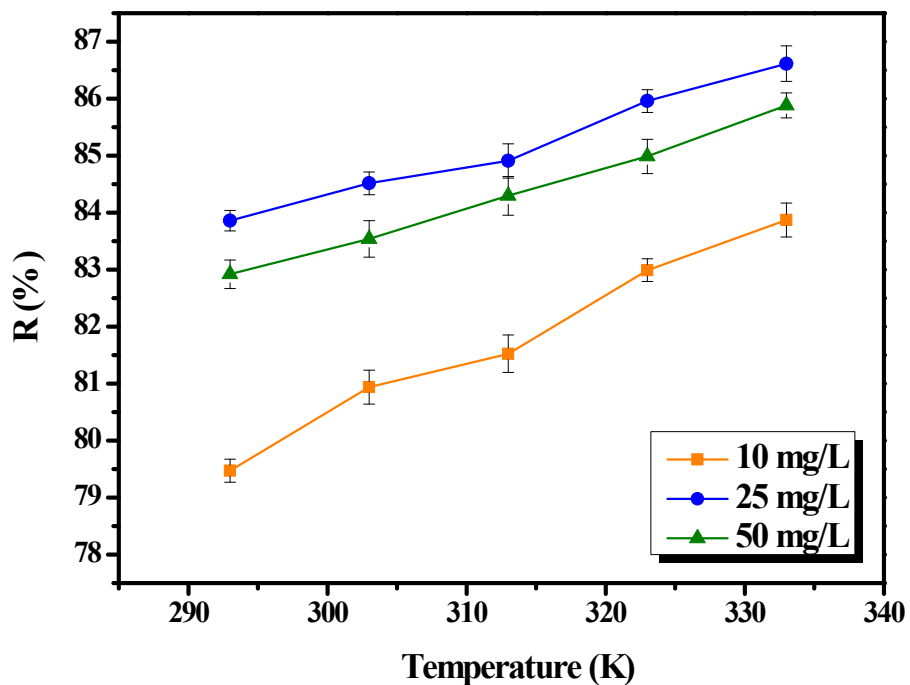

**Fig. S7.** Effect of reaction temperature on Cr(VI) ions removal percentage (%R) by the  $\text{NFe}_3\text{O}_4\text{Starch-Glu-NFe}_3\text{O}_4\text{ED}$  nanocomposite. (Sample volume = 10.0 mL; nanosorbent dose =  $10.0 \pm 1$  mg; Cr(VI) initial concentrations = 10.0, 25.0 and 50.0 mg/L; pH value = 2.0; shaking time = 60.0 min; temperature = 293.0, 303.0, 313.0, 323.0, and 333.0 K; shaking speed = 250.0 rpm).

**Table S1.** Chemicals and their specifications

| Chemical Name                                                                     | Molecular Formula (MF)                                        | Formula weight (FW) (g/mol) | Assay                          | CAS Reg. No. | Company                 |
|-----------------------------------------------------------------------------------|---------------------------------------------------------------|-----------------------------|--------------------------------|--------------|-------------------------|
| Starch (amylose 17.5%, amylopectin 82.5%, moisture content 12.0%, total ash 0.3%) | (C <sub>6</sub> H <sub>10</sub> O <sub>5</sub> ) <sub>n</sub> | 692.70                      | 99.0%                          | 9005-25-8    | Sigma Aldrich, USA      |
| Ethylenediamine                                                                   | C <sub>2</sub> H <sub>8</sub> N <sub>2</sub>                  | 60.10                       | 99.0%                          | 107-15-3     |                         |
| Glutaraldehyde                                                                    | C <sub>5</sub> H <sub>8</sub> O <sub>2</sub>                  | 100.12                      | 50.0 wt. % in H <sub>2</sub> O | 111-30-8     |                         |
| Anhydrous ferric chloride                                                         | FeCl <sub>3</sub>                                             | 162.20                      | 99.9%                          | 7705-08-0    |                         |
| Ferrous chloride                                                                  | FeCl <sub>2</sub>                                             | 126.75                      | 99.9%                          | 7758-94-3    |                         |
| Hydrochloric acid                                                                 | HCl                                                           | 36.46                       | 37.0%                          | 7647-01-0    |                         |
| Potassium chloride                                                                | KCl                                                           | 74.55                       | 99.0-100.5%                    | 7447-40-7    | BDH, UK                 |
| Sodium hydroxide                                                                  | NaOH                                                          | 40.00                       | 99.0%                          | 1310-73-2    |                         |
| Ammonium chloride                                                                 | NH <sub>4</sub> Cl                                            | 53.49                       | 99.5%                          | 12125-02-9   |                         |
| Ethanol                                                                           | C <sub>2</sub> H <sub>5</sub> OH                              | 46.07                       | 99.8%                          | 64-17-5      |                         |
| 1,5-Diphenylcarbazine                                                             | C <sub>13</sub> H <sub>14</sub> N <sub>4</sub> O              | 242.29                      | 99.0%                          | 140-22-7     |                         |
| Potassium dichromate                                                              | K <sub>2</sub> Cr <sub>2</sub> O <sub>7</sub>                 | 294.19                      | 99.8%                          | 7778-50-9    |                         |
| Sodium acetate anhydrous                                                          | CH <sub>3</sub> COONa                                         | 82.00                       | 99.0%                          | 127-09-3     | Merck, Germany          |
| Formaldehyde                                                                      | CH <sub>2</sub> O                                             | 30.03                       | 34.5%                          | 50-00-0      |                         |
| Sodium chloride                                                                   | NaCl                                                          | 58.44                       | 99.9%                          | 5-14-7647    | Riedel de Haën, Germany |
| Calcium chloride dihydrate                                                        | CaCl <sub>2</sub> ·2H <sub>2</sub> O                          | 147.01                      | 99.0%                          | 10035-04-8   |                         |
| Magnesium chloride hexahydrate                                                    | MgCl <sub>2</sub> ·6H <sub>2</sub> O                          | 203.30                      | 99.0%                          | 6-18-7791    |                         |

**Table S2.** Instruments and their specifications.

| <b>Instrument Name</b>                                             | <b>Model</b>                                                            | <b>Data</b>                                          | <b>Conditions</b>                                                                                                                                                                                                                                                 |
|--------------------------------------------------------------------|-------------------------------------------------------------------------|------------------------------------------------------|-------------------------------------------------------------------------------------------------------------------------------------------------------------------------------------------------------------------------------------------------------------------|
| Fourier-transform infrared spectrophotometer <b>FT-IR</b>          | A BRUKER VERTEX 70                                                      | FT-IR spectrum                                       | 400–4000 cm <sup>-1</sup>                                                                                                                                                                                                                                         |
| <b>TGA-7</b> thermobalance                                         | A Perkin-Elmer                                                          | Thermogram                                           | Pure atmospheric nitrogen, flow rate = 40 mL/min, heating rate = 10°C/min, sample mass in the range of 5.0–6.0 mg, heating temperature 25°C – 800°C                                                                                                               |
| X-ray diffraction ( <b>XRD</b> )                                   | Shimadzu lab x 6100, Kyoto, Japan                                       | XRD spectrum                                         | The XRD generator works at 40 kV, 30 mA, $\lambda = 1 \text{ \AA}$ , using target Cu-K $\alpha$ with secondary Monochromatic X-ray, 2 $\theta$ from 10° to 80°, recording steps of the diffraction data of 0.02°, at a time of 0.6 s, at room temperature (25°C). |
| Scanning electron microscope ( <b>SEM</b> )                        | JSM-IT200, JEOL Ltd<br>Sputtering coating (JEOL-JFC-1100E)              | SEM images                                           | Imaging mode                                                                                                                                                                                                                                                      |
| High-resolution transmission electron microscope ( <b>HR-TEM</b> ) | JEOL- JSM-1400 plus                                                     | HR-TEM image                                         | Imaging mode                                                                                                                                                                                                                                                      |
| Brunauer–Emmett–Teller ( <b>BET</b> ) surface area                 | BELSORP-mini II, BEL, Japan                                             | Surface area, pore volume and pore size distribution | The required data were determined by nitrogen adsorption–desorption isotherm measurements at adsorption temperature 77 K and saturated vapor pressure of 102.48 kPa for 24 h.                                                                                     |
| UV-Vis-spectrophotometer                                           | UV-Vis-7200 single beam                                                 | Absorbance                                           | 1.0 cm cell, wave length 540 cm <sup>-1</sup> wavelength range 190–1100 nm                                                                                                                                                                                        |
| Microwave oven                                                     | KOG-1B5H, Korea                                                         | Microwave irradiation                                | 1400-W, 2.45GHZ                                                                                                                                                                                                                                                   |
| pH meter                                                           | Orion pH meter model 420A fitted with an Orion combined glass electrode | pH-measurement                                       | Calibrated using standard buffers of pH 4.01, 7.00, and 10.00                                                                                                                                                                                                     |



**Table S3.** Equations and parameters of kinetic models

| Kinetic Model                   | Equation                                           | Plot                                                                                                                                                                                                                   | Kinetic Parameter                          | Cr(VI) Concentration (mg/L) |            |            |
|---------------------------------|----------------------------------------------------|------------------------------------------------------------------------------------------------------------------------------------------------------------------------------------------------------------------------|--------------------------------------------|-----------------------------|------------|------------|
|                                 |                                                    |                                                                                                                                                                                                                        |                                            | 10                          | 25         | 50         |
| <b>Pseudo-First Order</b>       | $\ln (q_e - q_t) = \ln (q_e) - k_1 t$              | ln (q <sub>e</sub> - q <sub>t</sub> ) versus time (t)<br>q <sub>e</sub> and q <sub>t</sub> are the sorption capacity at equilibrium and at time t (min), respectively, k <sub>1</sub> is the first order rate constant | q <sub>e</sub> (mg/g) (exp)                | 7.9800                      | 20.9800    | 41.4900    |
|                                 |                                                    |                                                                                                                                                                                                                        | q <sub>e</sub> (mg/g) (calc)               | 3.3906                      | 10.6867    | 29.1659    |
|                                 |                                                    |                                                                                                                                                                                                                        | K <sub>1</sub> (min <sup>-1</sup> )        | 0.1360                      | 0.1660     | 0.1790     |
|                                 |                                                    |                                                                                                                                                                                                                        | R <sup>2</sup>                             | 0.9280                      | 0.8820     | 0.8180     |
| <b>Pseudo-Second Order</b>      | $t/q_t = 1/k_2 q_e^2 + t/q_e$                      | t/q <sub>t</sub> versus time (t)<br>K <sub>2</sub> is the second order rate constant                                                                                                                                   | q <sub>e</sub> (mg/g) (exp)                | 7.9800                      | 20.9800    | 41.4900    |
|                                 |                                                    |                                                                                                                                                                                                                        | q <sub>e</sub> (mg/g) (calc)               | 8.1967                      | 21.7391    | 42.6076    |
|                                 |                                                    |                                                                                                                                                                                                                        | K <sub>2</sub> (g/mg min)                  | 0.1146                      | 0.0454     | 0.0173     |
|                                 |                                                    |                                                                                                                                                                                                                        | R <sup>2</sup>                             | 0.9999                      | 0.9996     | 0.9998     |
| <b>Intra-particle Diffusion</b> | $q_t = k_{id} t^{1/2} + C$                         | q <sub>t</sub> versus (t <sup>1/2</sup> )<br>C is the thickness of the adsorption layer, K <sub>id</sub> is the intra-particle order rate constant                                                                     | K <sub>id</sub> (mg/g min <sup>1/2</sup> ) | 0.3460                      | 0.8040     | 1.8790     |
|                                 |                                                    |                                                                                                                                                                                                                        | C                                          | 5.7420                      | 15.7200    | 29.0700    |
|                                 |                                                    |                                                                                                                                                                                                                        | R <sup>2</sup>                             | 0.8070                      | 0.8700     | 0.8940     |
| <b>Elovich</b>                  | $q_t = 1/\beta \ln(\alpha\beta) + 1/\beta \ln (t)$ | q <sub>t</sub> versus ln t<br>α is the initial adsorption rate, β is related to the extent of surface coverage and the activation energy for the chemisorption                                                         | α (mg/g min)                               | 2916.4027                   | 50100.6158 | 14539.1641 |
|                                 |                                                    |                                                                                                                                                                                                                        | β (mg/g)                                   | 1.5198                      | 0.6789     | 0.2945     |

|  |  |         |  |  |  |  |
|--|--|---------|--|--|--|--|
|  |  | process |  |  |  |  |
|--|--|---------|--|--|--|--|

**Table S4.** Linear equations and their parameters for different adsorption isotherm models

| Isotherm Model                    | Linear Equation                               | Linear Plot                                                                                                                                                                                                                                                            | Isotherm Parameter                           | Value of Isotherm Parameter |
|-----------------------------------|-----------------------------------------------|------------------------------------------------------------------------------------------------------------------------------------------------------------------------------------------------------------------------------------------------------------------------|----------------------------------------------|-----------------------------|
| <b>Langmuir</b>                   | $C_e/q_e = 1/q_{max} K_L + C_e/q_{max}$       | $C_e/q_e$ versus $C_e$<br>slope = $1/q_m$ and<br>intercept = $1/(K_L q_{max})$<br>$K_L$ is the Langmuir constant,<br>$q_{max}$ is the maximum adsorption capacity                                                                                                      | $q_{max}$ (mg/g)                             | 210.7410                    |
|                                   |                                               |                                                                                                                                                                                                                                                                        | $K_L$ (L/mg)                                 | 0.0274                      |
|                                   |                                               |                                                                                                                                                                                                                                                                        | $R_L$                                        | 0.2676-0.6463               |
|                                   |                                               |                                                                                                                                                                                                                                                                        | $R^2$                                        | 0.9501                      |
| <b>Freundlich</b>                 | $\ln(q_e) = \ln(K_F) + 1/n \ln(C_e)$          | $\ln q_e$ versus $\ln C_e$<br>slope = $1/n$ and<br>intercept = $\ln K_F$<br>$K_F$ is the Freundlich constant related to the affinity of the adsorbate to the binding sites of the adsorbent,<br>$n$ is the intensity of the adsorbent                                  | n                                            | 1.2007                      |
|                                   |                                               |                                                                                                                                                                                                                                                                        | $K_F$ (L/mg)                                 | 6.1176                      |
|                                   |                                               |                                                                                                                                                                                                                                                                        | $R^2$                                        | 0.9340                      |
| <b>Temkin</b>                     | $q_e = (RT/b_T) \ln(a_T) + (RT/b_T) \ln(c_e)$ | $q_e$ versus $\ln C_e$<br>slope = $B$ and intercept = $B \ln a_T$<br>$a_T$ is Temkin isotherm equilibrium binding constant corresponding to the maximum binding energy,<br>$b_T$ is the Temkin isotherm equilibrium binding constant related to the heat of adsorption | $a_T$ (L/g)                                  | 0.5810                      |
|                                   |                                               |                                                                                                                                                                                                                                                                        | $b_T$ (KJ/mol)                               | 0.0914                      |
|                                   |                                               |                                                                                                                                                                                                                                                                        | B                                            | 26.6384                     |
|                                   |                                               |                                                                                                                                                                                                                                                                        | $R^2$                                        | 0.9927                      |
| <b>Dubinin-Radushkevich (D-R)</b> | $\ln(q_e) = \ln(q_s) - (K_{ad}\epsilon^2)$    | $\ln q_e$ versus $\epsilon^2$<br>slope = $K_{ad}$ and<br>intercept = $\ln(q_s)$<br>$\epsilon$ is the <i>polanyi</i> potential ( $\epsilon = RT \ln(1 + 1/C_e)$ ),<br>$q_s$ is the theoretical saturation capacity,<br>$K_{ad}$ is the D-R isotherm constant            | $q_s$ (mg/g)                                 | 52.0090                     |
|                                   |                                               |                                                                                                                                                                                                                                                                        | $K_{ad}$ (mol <sup>2</sup> /J <sup>2</sup> ) | 225.5934                    |
|                                   |                                               |                                                                                                                                                                                                                                                                        | $E_s$ (KJ/mol)                               | 0.0470                      |
|                                   |                                               |                                                                                                                                                                                                                                                                        | $R^2$                                        | 0.8920                      |
